# Supplementary material for: Synthesis, photophysics and electrochemical properties of 1,1′-(2,2′-bithiophene-5,5′-diyl)bis(cycloalkeno[c]pyridine) as a result of the Diels–Alder reaction of 3-(2-thienyl)-1,2,4-triazine
Source: Royal Society of Chemistry journal article supplement (doi:10.1039/c5nj01937k), 2015-01-01
Supplement: c5nj01937k1.pdf [file c5nj01937k1.pdf]

Cite this: DOI: 10.1039/c0xx00000x

www.rsc.org/xxxxxx

Paper

### Supplementary materials

5

## Synthesis, photophysics and electrochemical properties of 1,1'-(2,2'-bithiophene-5,5'-diyl)bis(cycloalkeno[*c*]pyridine) as a result of Diels-Alder reaction of 3-(2-thienyl)-1,2,4-triazine

Danuta Branowska,\*<sup>a</sup> Waldemar Wysocki,<sup>a</sup> Ewa Olender,<sup>a</sup> Justyna Ławecka,<sup>a</sup> Bartosz Chaciak,<sup>a</sup>  
10 Przemysław Ledwon,<sup>b</sup> Mieczysław Lapkowski,<sup>b,c</sup> Zbigniew Karczmarzyk,<sup>a</sup>

Received (in XXX, XXX) Xth XXXXXXXXXX 200X, Accepted Xth XXXXXXXXXX 200X

DOI: 10.1039/b000000x

<sup>a</sup>Siedlce University, Institute of Chemistry, 3 Maja 54, 08-110 Siedlce, Poland. Fax: 48 25643 1093; Tel: 48 25 6431128; E-mail: dankab@uph.edu.pl

<sup>b</sup>Silesian University of Technology, Faculty of Chemistry, 44-100 Gliwice, Poland

15 <sup>c</sup>Centre of Polymer and Carbon Materials, Polish Academy of Sciences, M. Curie-Skłodowskiej 34, 41-819 Zabrze, Poland

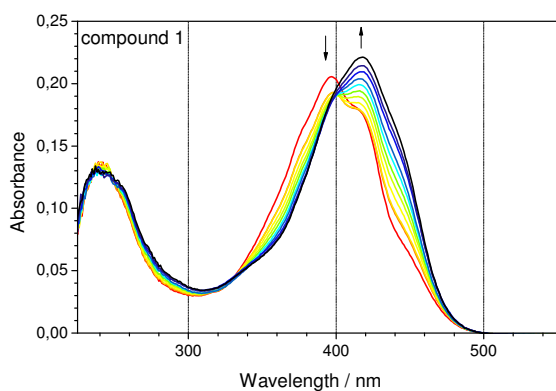

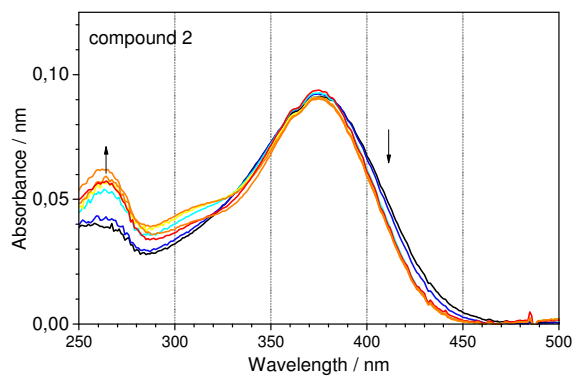

Figure S1 UV-Vis spectra recorded during oxidation of compounds 1 and 2 in  $\text{CH}_2\text{Cl}_2/\text{Bu}_4\text{NPF}_6$  solution.
